# Supplementary material for: Synthesis and anticancer activity of prodigiosenes bearing C-ring esters and amides
Source: Royal Society of Chemistry journal article supplement (doi:10.1039/c7ra01628j), 2017-01-01

## Synthesis and Anticancer Activity of Prodigiosenes bearing C-Ring Esters and Amides

*Kate-lyn A. R. Lund, Carlotta Figliola, Aleksandra K. Kajetanowicz and Alison Thompson\**

Department of Chemistry, Dalhousie University, P.O. Box 15000, Halifax, Nova Scotia, Canada, B3H 4R2

### Supporting Information

#### Table of Contents

|                                                                                                                                                            |    |
|------------------------------------------------------------------------------------------------------------------------------------------------------------|----|
| NCI DATA REPORTED USING DRUG CONCENTRATION VALUES .....                                                                                                    | 2  |
| NMR SPECTRA .....                                                                                                                                          | 4  |
| Benzyl 3-(3-ethoxy-3-oxopropyl)-4-(3-methoxy-3-oxopropyl)-5-methyl-1H-pyrrole-2-carboxylate (1) .....                                                      | 4  |
| 4-[(Methoxycarbonyl)ethyl]-3-[2-(ethoxycarbonyl)ethyl]-5-methyl pyrrole-2-carboxaldehyde (3) .....                                                         | 5  |
| 4-(Benzylmethanoate)-3[(methoxycarbonyl)ethyl]-5-methyl pyrrole-2-carboxaldehyde (4) .....                                                                 | 6  |
| (Z)-Ethyl 3-(4-(3-methoxy-3-oxopropyl)-2-((3-methoxy-5-oxo-1H-pyrrol-2(5H)-ylidene)methyl)-5-methyl-1H-pyrrol-3-yl)propanoate (5) .....                    | 7  |
| (Z)-Benzyl 4-(3-(3-methoxy-3-oxopropyl)-2-(3-methoxy-5-oxo-1H-pyrrole-2(5H)-ylidene)methyl)-5-methyl-1H-pyrrol-3-yl)formate (6) .....                      | 8  |
| (Z)-Ethyl 3-(2-((5-bromo-3-methoxy-2H-pyrrol-2-ylidene)methyl)-4-(3-methoxy-oxopropyl)-5-methyl-1H-pyrrol-3-yl)propanoate (7) .....                        | 9  |
| (Z)-Benzyl 4-(2-((5-bromo-3-methoxy-2H-pyrrol-2-ylidene)methyl)-3-(3-methoxy-3-oxopropyl)-5-methyl-1H-pyrrol-3-yl)formate (8) .....                        | 10 |
| (Z)-Ethyl 3-(2-((4-methoxy-1H-1H'-[2,2'-bipyrrol]-5-yl)methylene)-4-(3-methoxy-3-oxopropyl)-5-methyl-2H-pyrrol-3-yl)propanoate hydrochloride (9•HCl) ..... | 11 |
| (Z)-Benzyl 4-(2-((4-methoxy-1H,1H'-[2,2'-bipyrrol]-5-yl)methylene)-3-(3-methoxy-3-oxopropyl)-5-methyl-2H-pyrrol-3-yl)formate (10•HCl) .....                | 12 |
| (Z)-Methyl 3-(2-((4-methoxy-1H,1H'-[2,2'-bipyrrol]-5-yl)methylene)-4-(2-methoxy-2-oxoethyl)-5-methyl-2H-pyrrol-3-yl)propanoate (13•HCl) .....              | 13 |
| (Z)-Methyl 3-(2-((4-methoxy-1H,1H'-[2,2'-bipyrrol]-5-yl)methylene)-4,5-dimethyl-2H-pyrrol-3-yl)propanoate (14•HCl) .....                                   | 14 |
| (Z)-Benzyl 2-(2-((4-methoxy-1H,1H'-[2,2'-bipyrrol]-5-yl)methylene)-3,5-dimethyl-2H-pyrrol-4-yl)acetate (15a•HCl) .....                                     | 15 |
| (Z)-Hexyl 2-(2-((4-methoxy-1H,1H'-[2,2'-bipyrrol]-5-yl)methylene)-3,5-dimethyl-2H-pyrrol-4-yl)acetate (15b•HCl) .....                                      | 16 |
| (Z)-Neopentyl 2-(2-((4-methoxy-1H,1H'-[2,2'-bipyrrol]-5-yl)methylene)-3,5-dimethyl-2H-pyrrol-4-yl)acetate hydrochloride (15c•HCl) .....                    | 17 |
| (Z)-Benzyl 2-(2-((4-methoxy-1H,1H'-[2,2'-bipyrrol]-5-yl)methylene)-3,5-dimethyl-2H-pyrrol-4-yl)acetamide hydrochloride (15d•HCl) .....                     | 18 |
| (Z)-Butyl 2-(2-((4-methoxy-1H,1H'-[2,2'-bipyrrol]-5-yl)methylene)-3,5-dimethyl-2H-pyrrol-4-yl)acetamide hydrochloride (15e•HCl) .....                      | 19 |
| (Z)-N,N-Diethyl 2-(2-((4-methoxy-1H,1H'-[2,2'-bipyrrol]-5-yl)methylene)-3,5-dimethyl-2H-pyrrol-4-yl)acetamide hydrochloride (15f•HCl) .....                | 20 |

## NCI data reported using drug concentration values

| Compound              | Mean GI <sub>50</sub> <sup>a</sup> (μM) | Mean TGI <sup>b</sup> (μM) | Mean LC <sub>50</sub> <sup>c</sup> (μM) | tPSA (Å <sup>2</sup> ) |
|-----------------------|-----------------------------------------|----------------------------|-----------------------------------------|------------------------|
| <b>Prodigiosin</b>    | 0.014                                   | 2.1                        | 0.22                                    | 45.65                  |
| <b>Prodigiosin-Me</b> | 0.015                                   | 0.14                       | 1.1                                     | 45.65                  |
| <b>10</b>             | 0.85                                    | 4.9                        | 45                                      | 98.25                  |
| <b>11</b>             | 3.5                                     | 15                         | 51                                      | 98.25                  |
| <b>12</b>             | 0.54                                    | 5.4                        | 30                                      | 71.95                  |
| <b>13</b>             | 0.37                                    | 2.5                        | 28                                      | 98.25                  |
| <b>14</b>             | 0.35                                    | 2.0                        | 17                                      | 71.95                  |
| <b>15</b>             | 0.2                                     | 2.3                        | 20                                      | 71.95                  |
| <b>15a</b>            | 0.32                                    | 1.8                        | 16                                      | 71.95                  |
| <b>15b</b>            | 0.091                                   | 1.0                        | 5.9                                     | 71.95                  |
| <b>15c</b>            | 0.22                                    | 1.2                        | 5.5                                     | 71.95                  |
| <b>15d</b>            | 1.4                                     | 3.0                        | 6.0                                     | 74.75                  |
| <b>15e</b>            | 2.4                                     | 8.7                        | 46                                      | 74.75                  |
| <b>15f</b>            | 0.48                                    | 11                         | 65                                      | 65.96                  |

**Table 15.** Mean *in vitro* activity of prodigiosin (**1**) and prodigosenes **2b-d**, **3-11** over 60 cancer cell lines; (<http://dtp.cancer.gov>); <sup>a</sup>GI<sub>50</sub> = half maximal growth inhibition concentration; <sup>b</sup>TGI = total growth inhibition concentration; <sup>c</sup>LC<sub>50</sub> = half maximal lethal concentration.

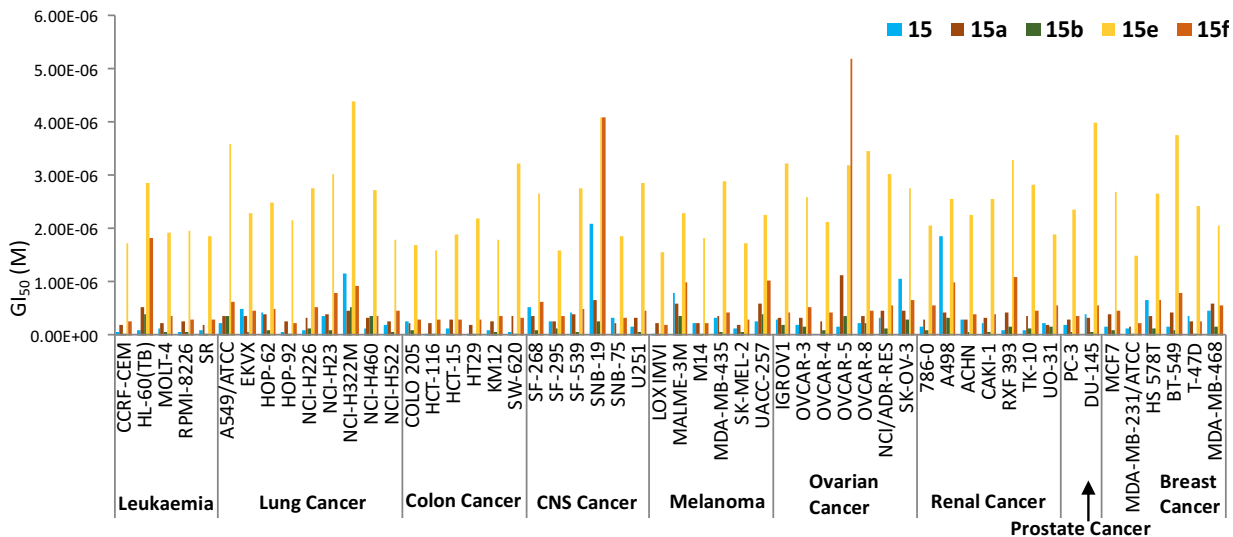

Figure 1S: GI<sub>50</sub> concentrations (half maximal growth inhibition concentrations) of prodigiosenes 15, 15a, 15b, 15e and 15f against the NCI-60 human cancer cell lines representing 9 different cancer types; see <http://http.dtp.cancer.gov>

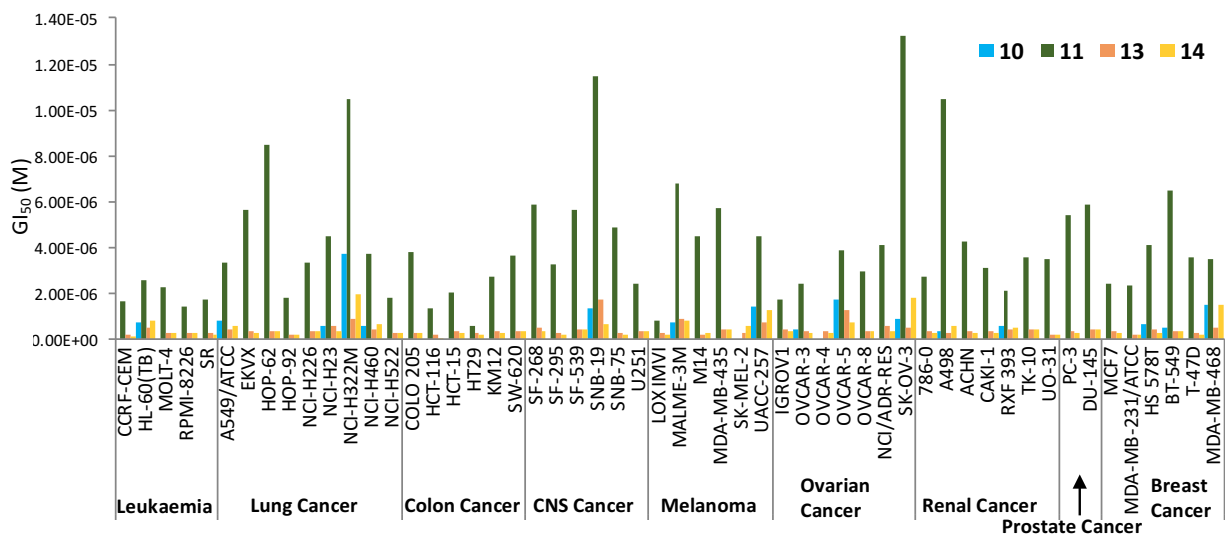

Figure 2S: GI<sub>50</sub> concentrations (half maximal growth inhibition concentrations) of prodigiosenes 10, 11, 13 and 14 against the NCI-60 human cancer cell lines representing 9 different cancer types; see <http://http.dtp.cancer.gov>

## NMR Spectra

### *Benzyl 3-(3-ethoxy-3-oxopropyl)-4-(3-methoxy-3-oxopropyl)-5-methyl-1H-pyrrole-2-carboxylate (1)*

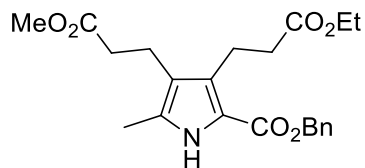

$^1\text{H}$  NMR; 300 MHz,  $\text{CDCl}_3$

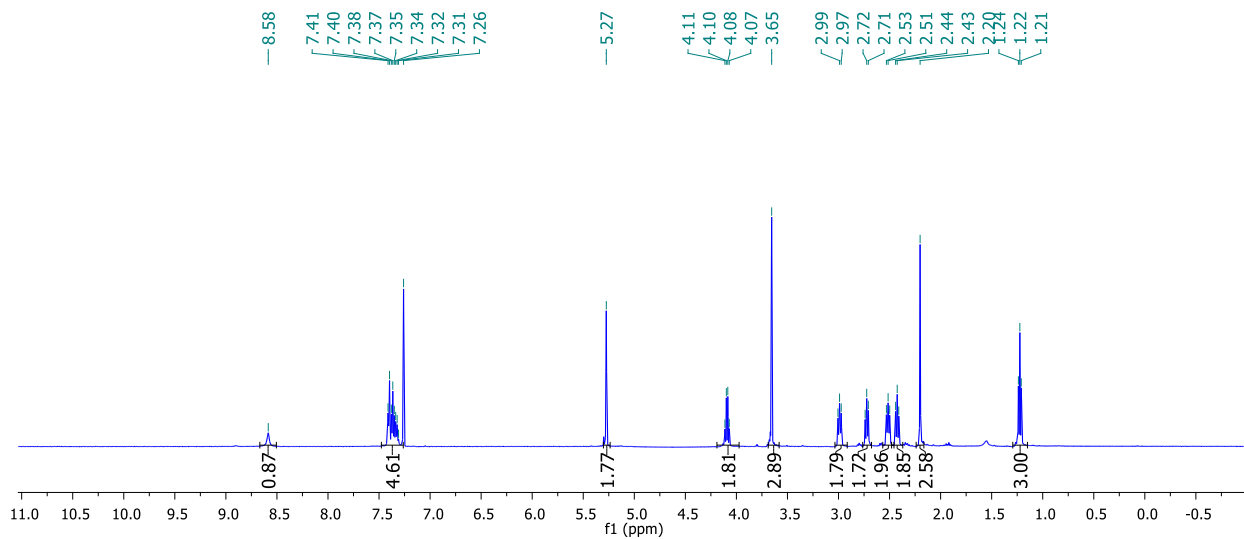

$^{13}\text{C}$  NMR; 125 MHz,  $\text{CDCl}_3$

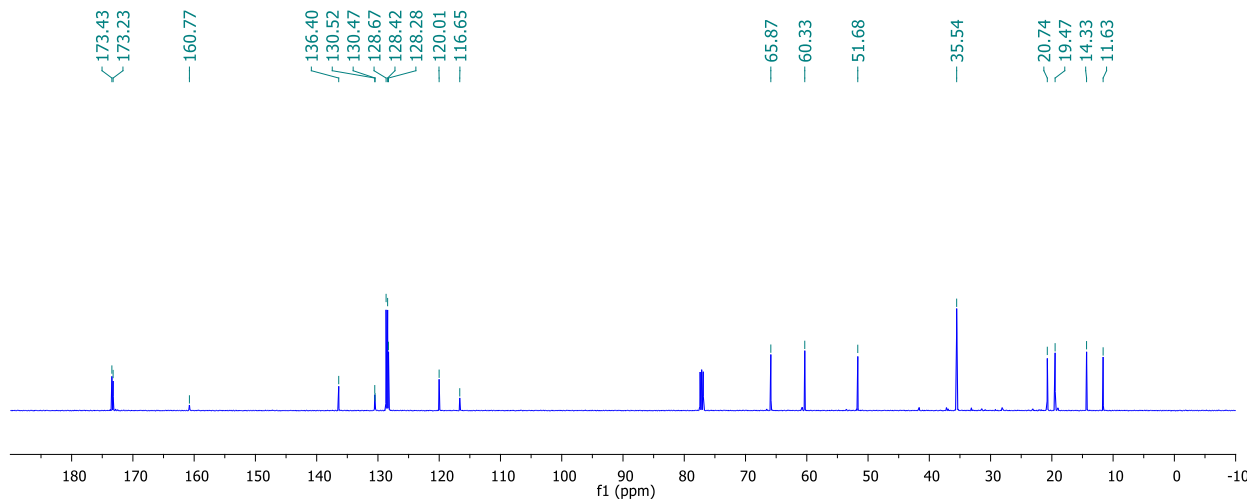

**4-[(Methoxycarbonyl)ethyl]-3-[2-(ethoxycarbonyl)ethyl]-5-methyl pyrrole-2-carboxaldehyde (3)**

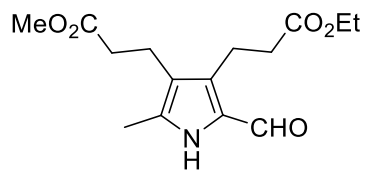

<sup>1</sup>H NMR; 300 MHz, CDCl<sub>3</sub>

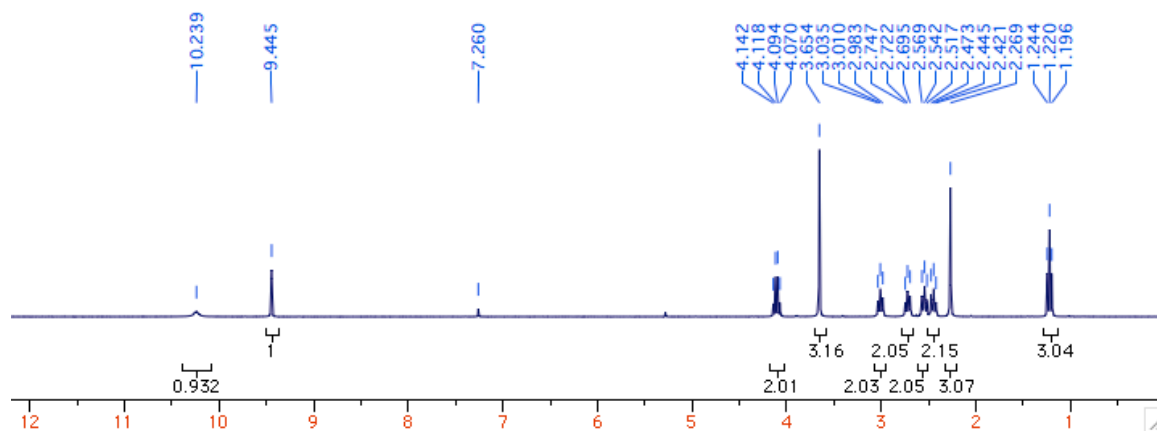

<sup>13</sup>C NMR; 75 MHz, CDCl<sub>3</sub>

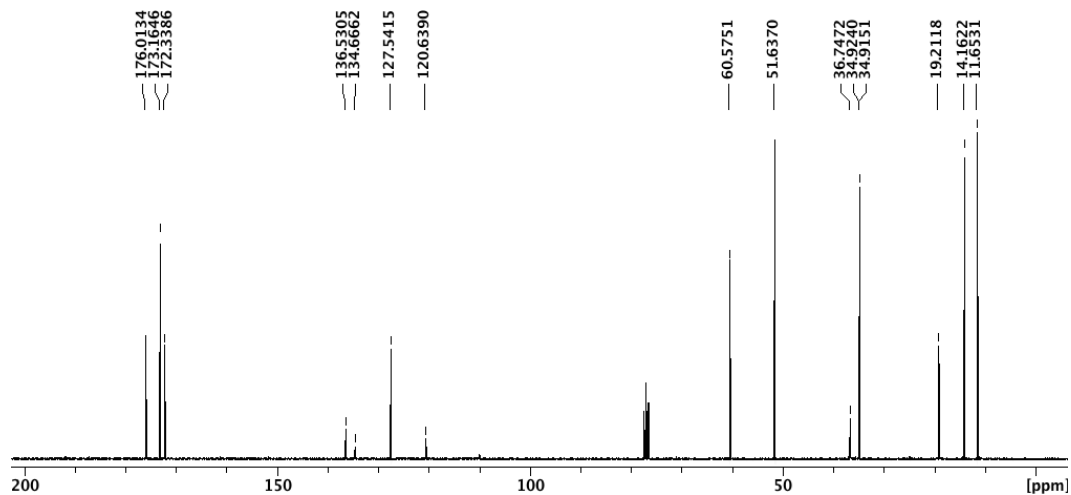

**4-(Benzylmethanoate)-3[(methoxycarbonyl)ethyl]-5-methyl pyrrole-2-carboxaldehyde (4)**

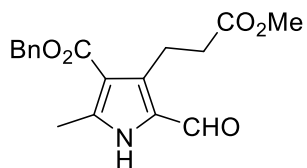

$^1\text{H}$  NMR; 300 MHz,  $\text{CDCl}_3$

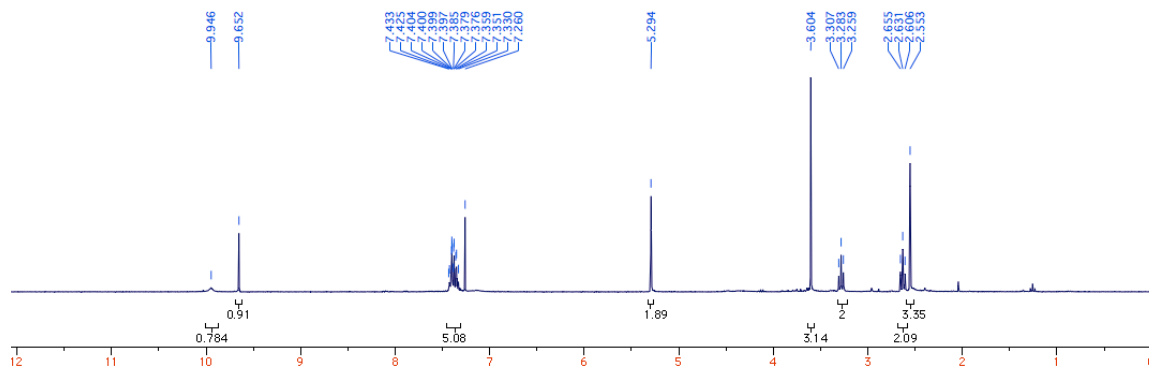

$^{13}\text{C}$  NMR; 125 MHz,  $\text{CDCl}_3$

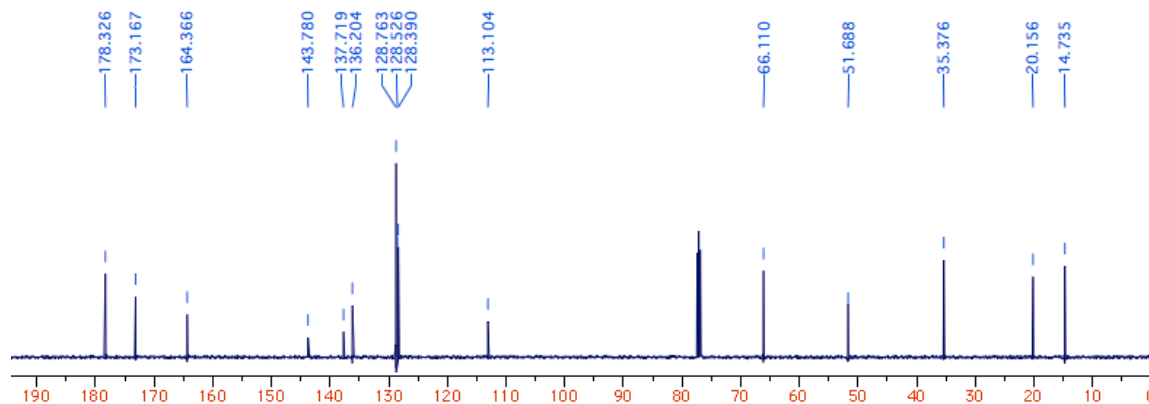

**(Z)-Ethyl 3-(4-(3-methoxy-3-oxopropyl)-2-((3-methoxy-5-oxo-1H-pyrrol-2(5H)-ylidene)methyl)-5-methyl-1H-pyrrol-3-yl)propanoate (5)**

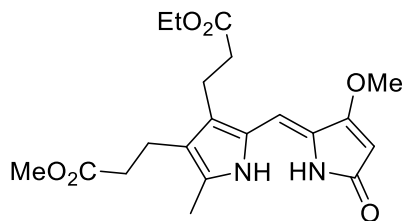

$^1\text{H}$  NMR; 500 MHz,  $\text{CDCl}_3$

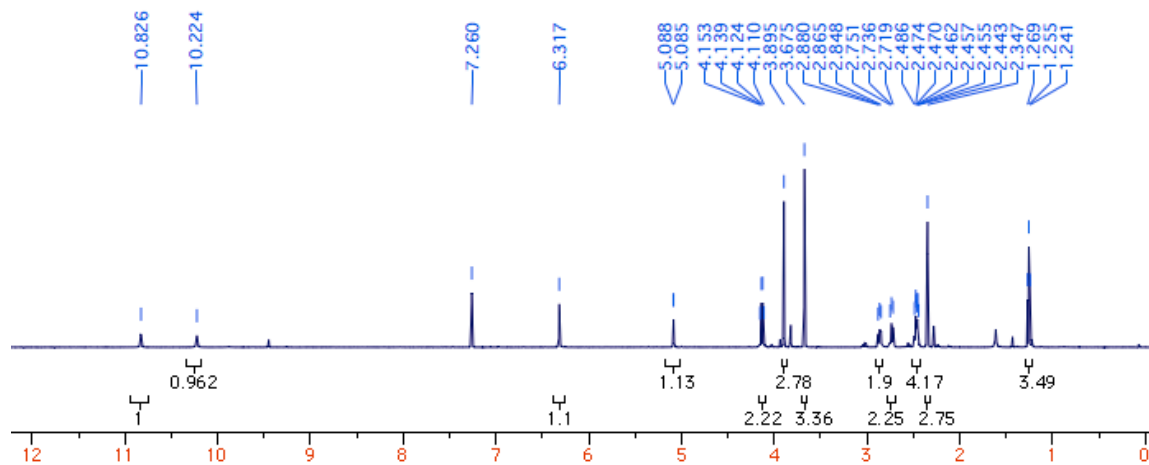

$^{13}\text{C}$  NMR; 125 MHz,  $\text{CDCl}_3$

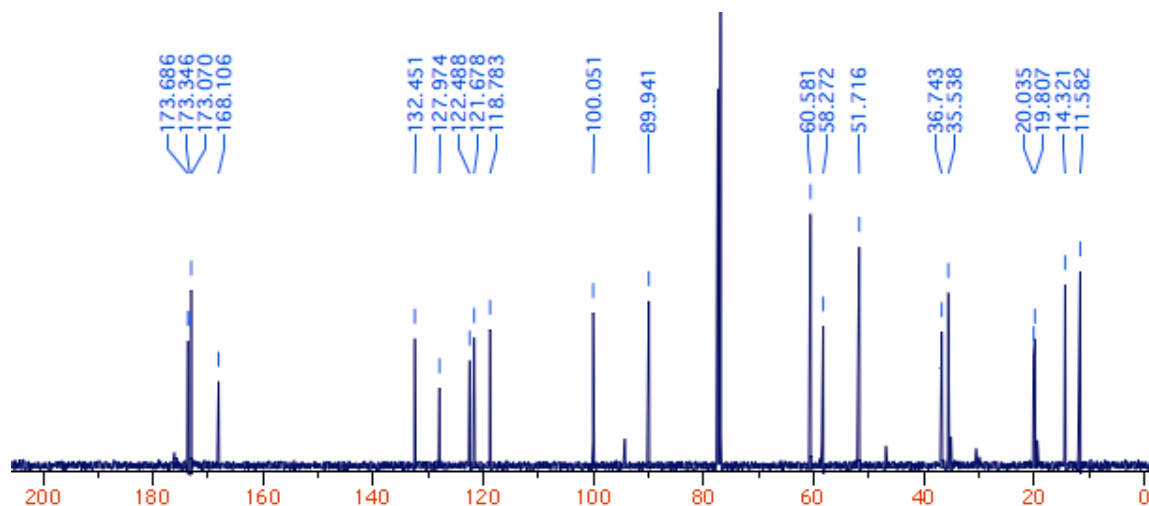

**(Z)-Benzyl 4-(3-(3-methoxy-3-oxopropyl)-2-(3-methoxy-5-oxo-1H-pyrrole-2(5H)-ylidene)methyl)-5-methyl-1H-pyrrol-3-yl)formate (6)**

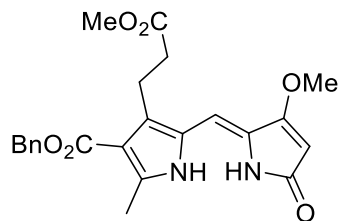

<sup>1</sup>H NMR; 500 MHz, DMSO

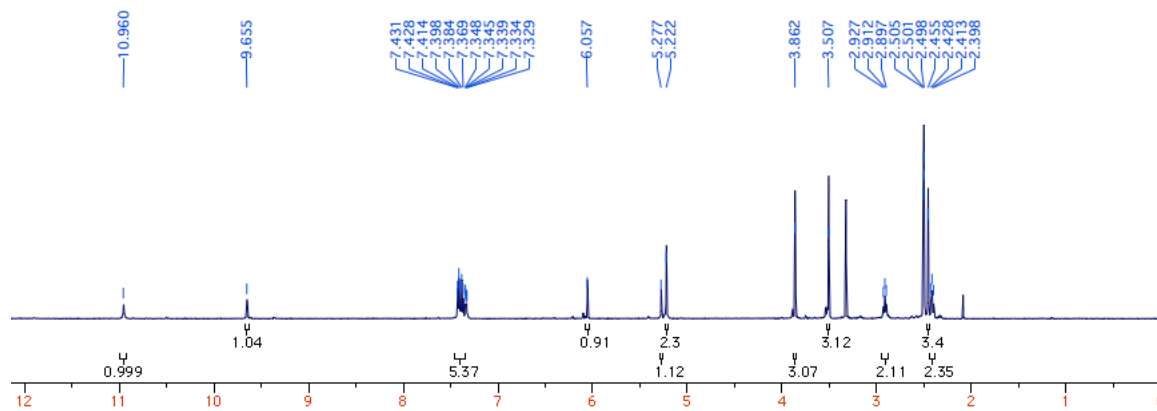

<sup>13</sup>C NMR; 125 MHz, DMSO

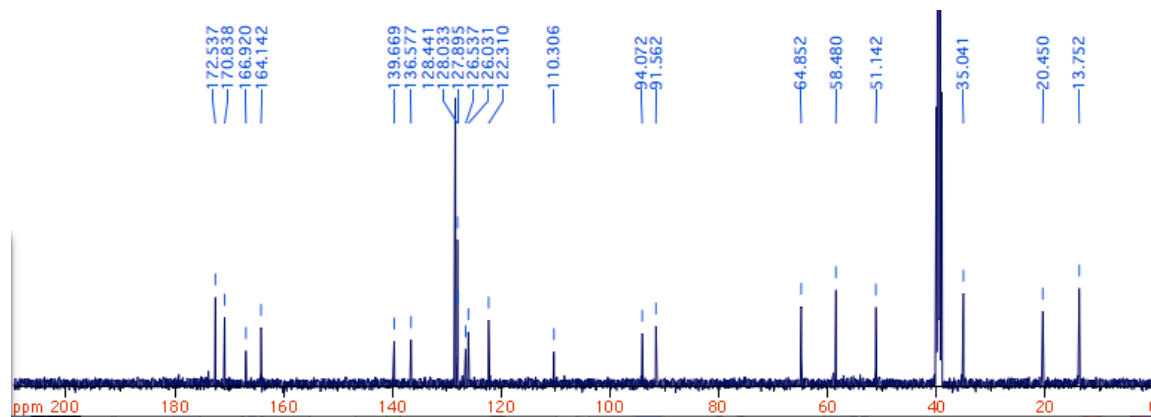



**(Z)-Ethyl 3-(2-((5-bromo-3-methoxy-2H-pyrrol-2-ylidene)methyl)-4-(3-methoxy-oxopropyl)-5-methyl-1H-pyrrol-3-yl)propanoate (7)**

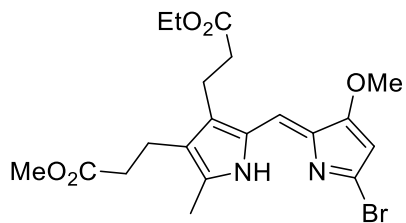

$^1\text{H}$  NMR; 500 MHz,  $\text{CDCl}_3$

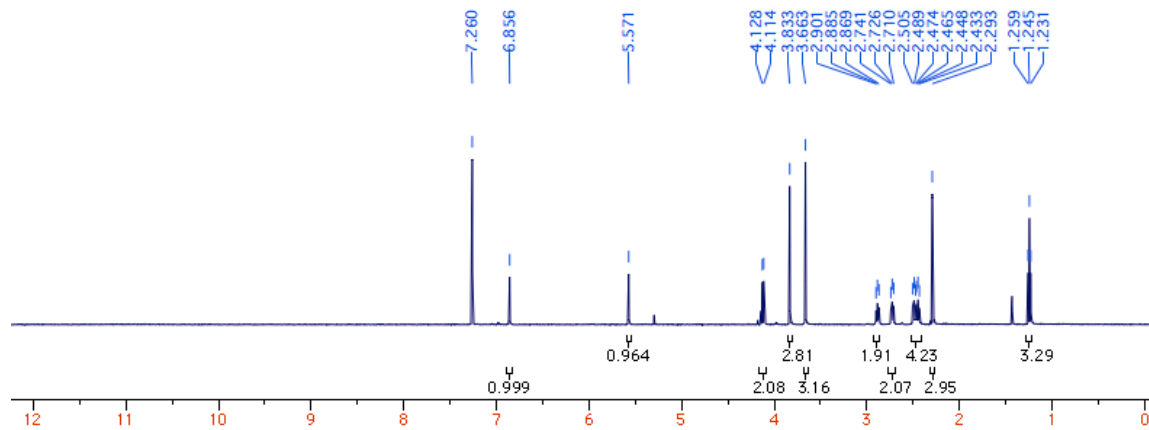

$^{13}\text{C}$  NMR; 125 MHz,  $\text{CDCl}_3$

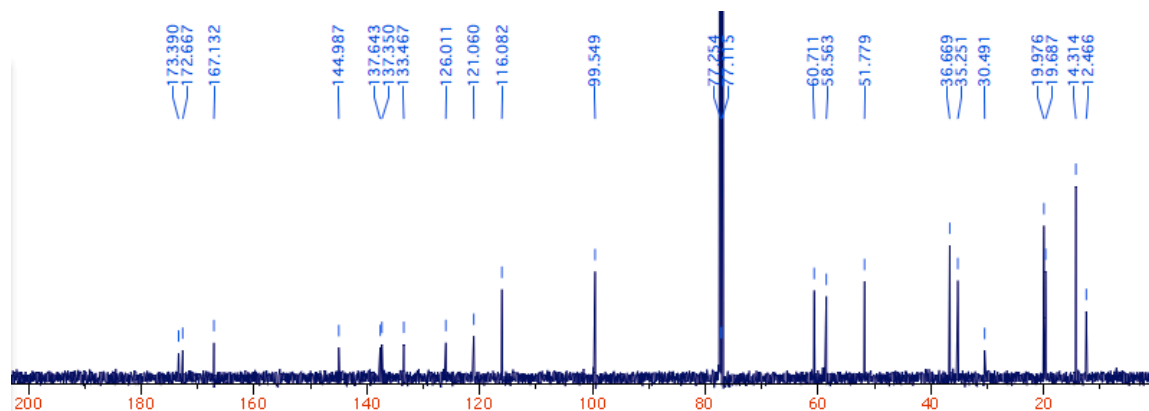

**(Z)-Benzyl 4-(2-((5-bromo-3-methoxy-2H-pyrrol-2-ylidene)methyl)-3-(3-methoxy-3-oxopropyl)-5-methyl-1H-pyrrol-3-yl)formate (8)**

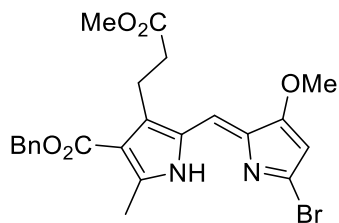

$^1\text{H NMR}$ ; 500 MHz,  $\text{CDCl}_3$

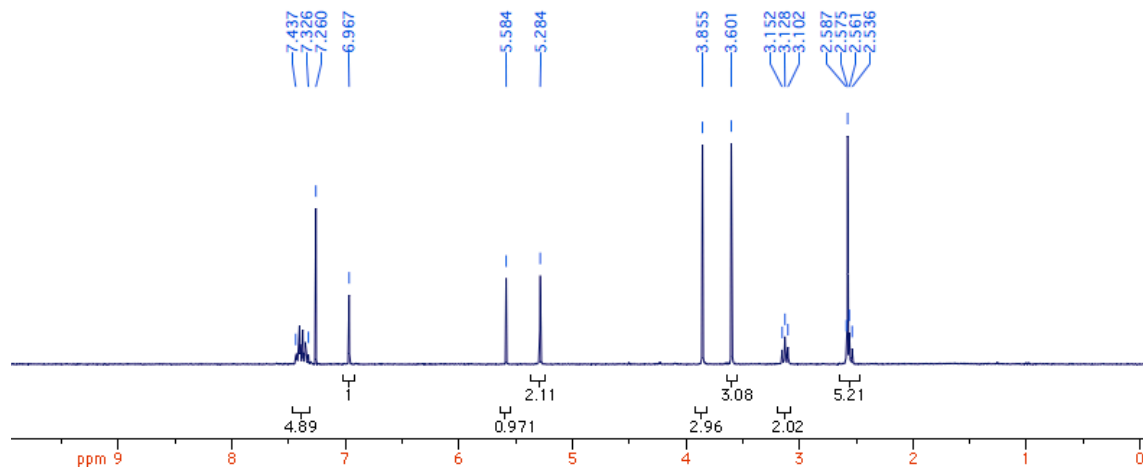

$^{13}\text{C NMR}$ ; 125 MHz,  $\text{CDCl}_3$

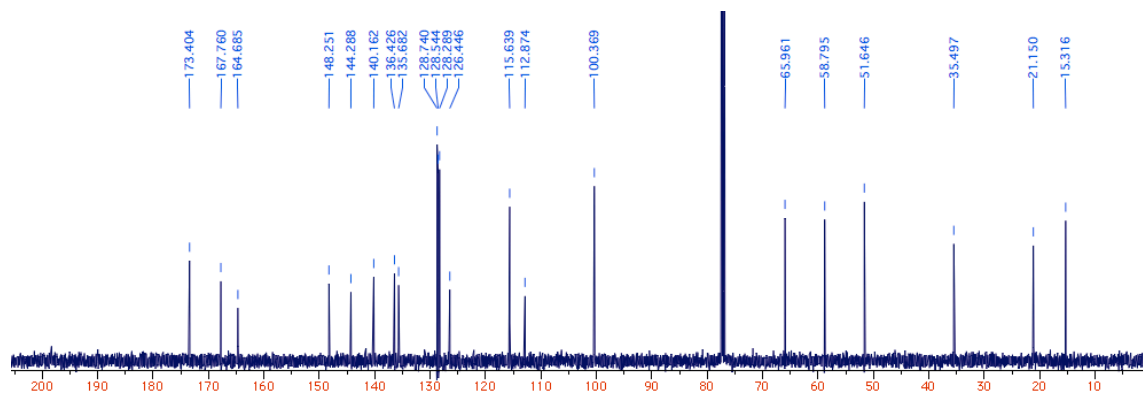

**(Z)-Ethyl 3-(2-((4-methoxy-1H-1H'-[2,2'-bipyrrol]-5-yl)methylene)-4-(3-methoxy-3-oxopropyl)-5-methyl-2H-pyrrol-3-yl)propanoate hydrochloride (9•HCl)**

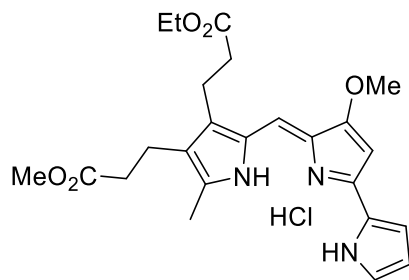

<sup>1</sup>H NMR; 500 MHz, CDCl<sub>3</sub>

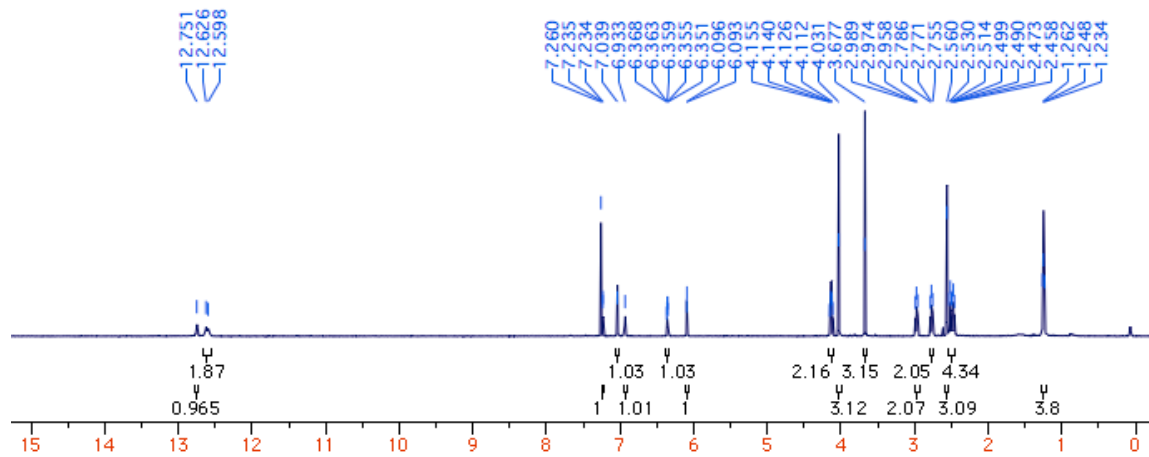

<sup>13</sup>C NMR; 500 MHz, CDCl<sub>3</sub>

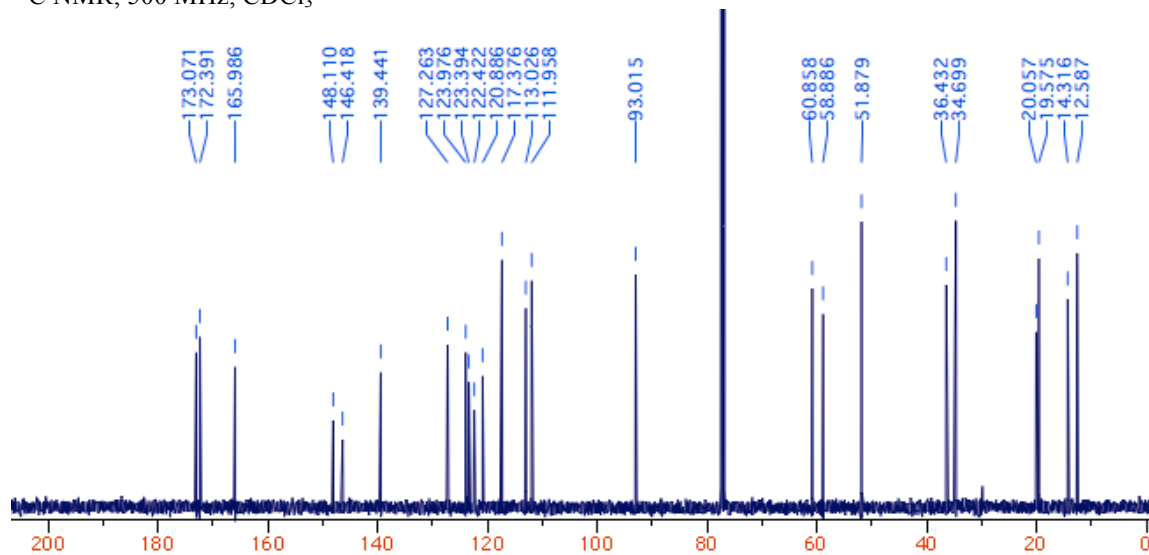

**(Z)-Benzyl 4-(2-((4-methoxy-1H,1H'-[2,2'-bipyrrol]-5-yl)methylene)-3-(3-methoxy-3-oxopropyl)-5-methyl-2H-pyrrol-3-yl)formate (10•HCl)**

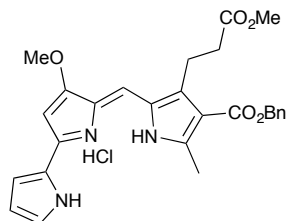

<sup>1</sup>H NMR; 500 MHz, CDCl<sub>3</sub>

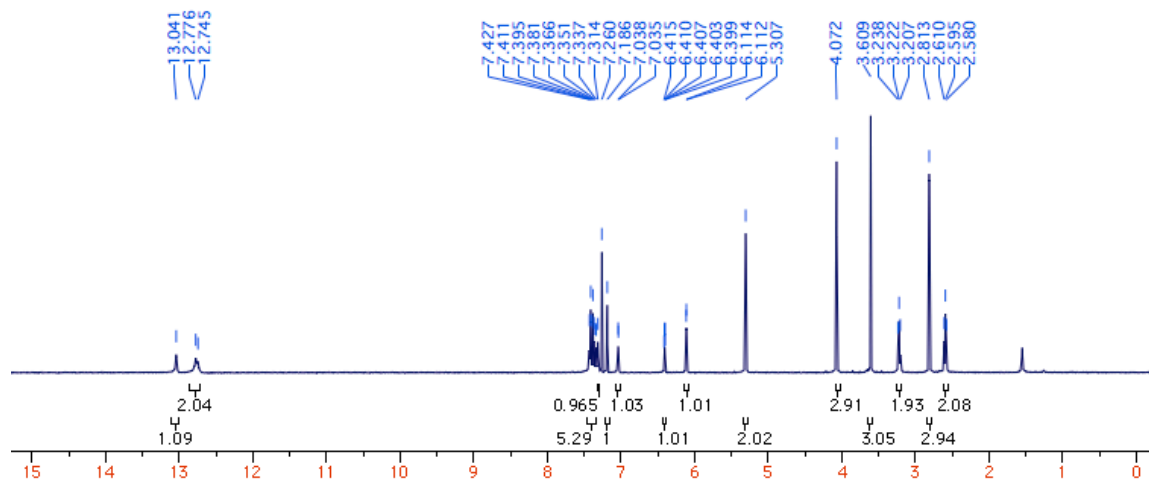

<sup>13</sup>C NMR; 125 MHz, CDCl<sub>3</sub>

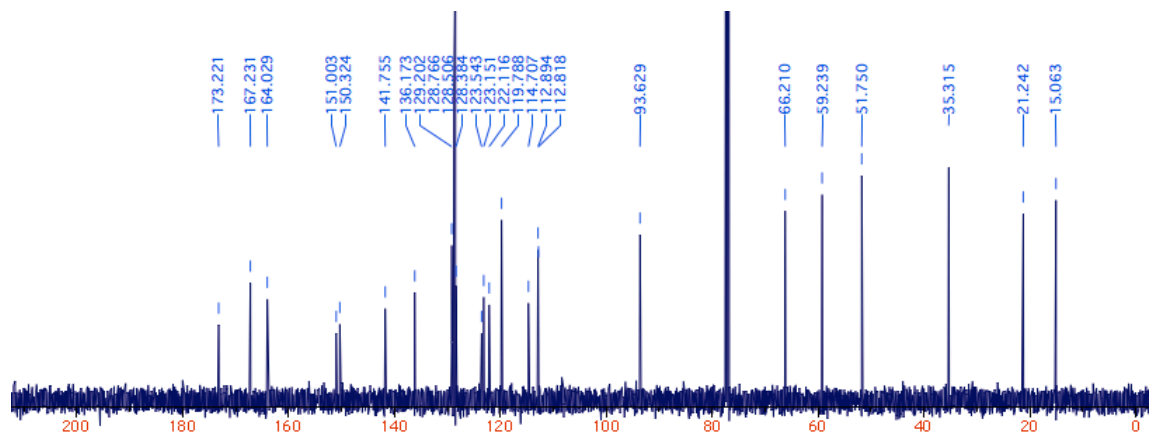

**(Z)-Methyl 3-(2-((4-methoxy-1H,1'H-[2,2'-bipyrrol]-5-yl)methylene)-4-(2-methoxy-2-oxoethyl)-5-methyl-2H-pyrrol-3-yl)propanoate (13•HCl)**

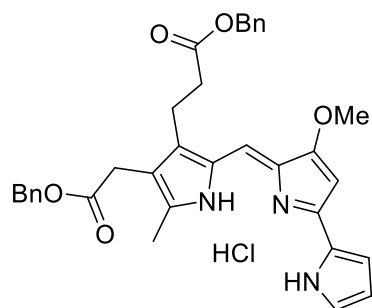

<sup>1</sup>H NMR; 500 MHz, CDCl<sub>3</sub>

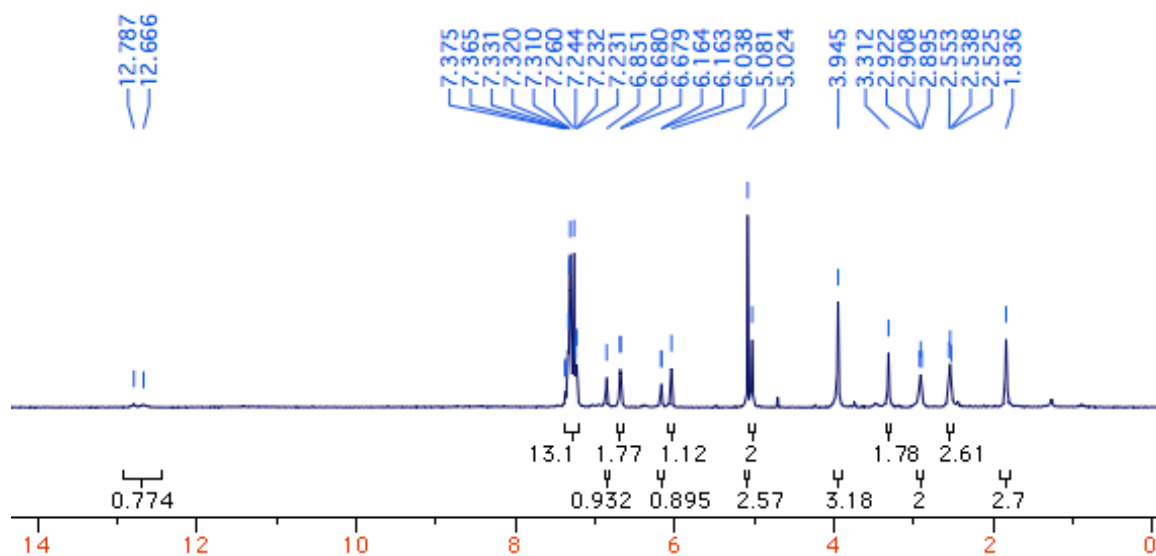

<sup>13</sup>C NMR; 125 MHz, CDCl<sub>3</sub>

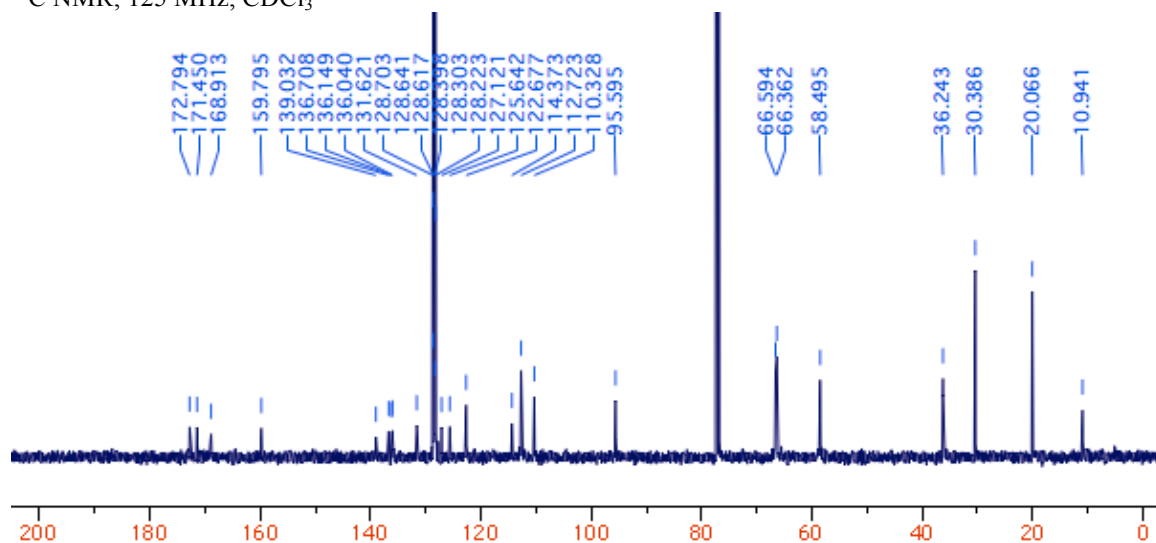

**(Z)-Methyl 3-(2-((4-methoxy-1H,1'H-[2,2'-bipyrrol]-5-yl)methylene)-4,5-dimethyl-2H-pyrrol-3-yl)propanoate (14•HCl)**

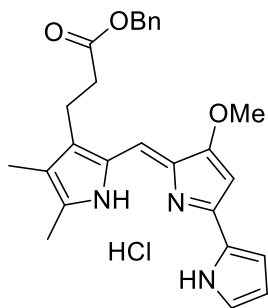

<sup>1</sup>H NMR; 500 MHz, CDCl<sub>3</sub>

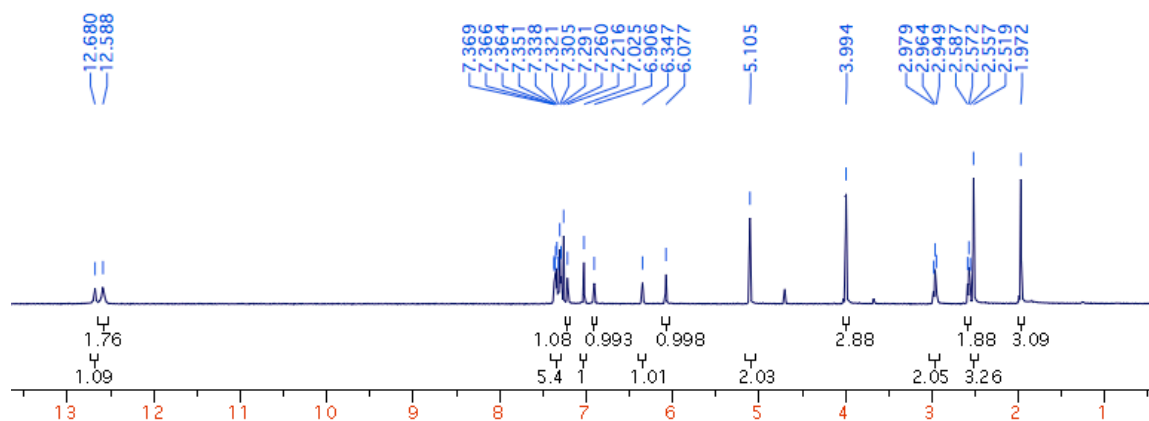

<sup>13</sup>C NMR; 125 MHz, CDCl<sub>3</sub>

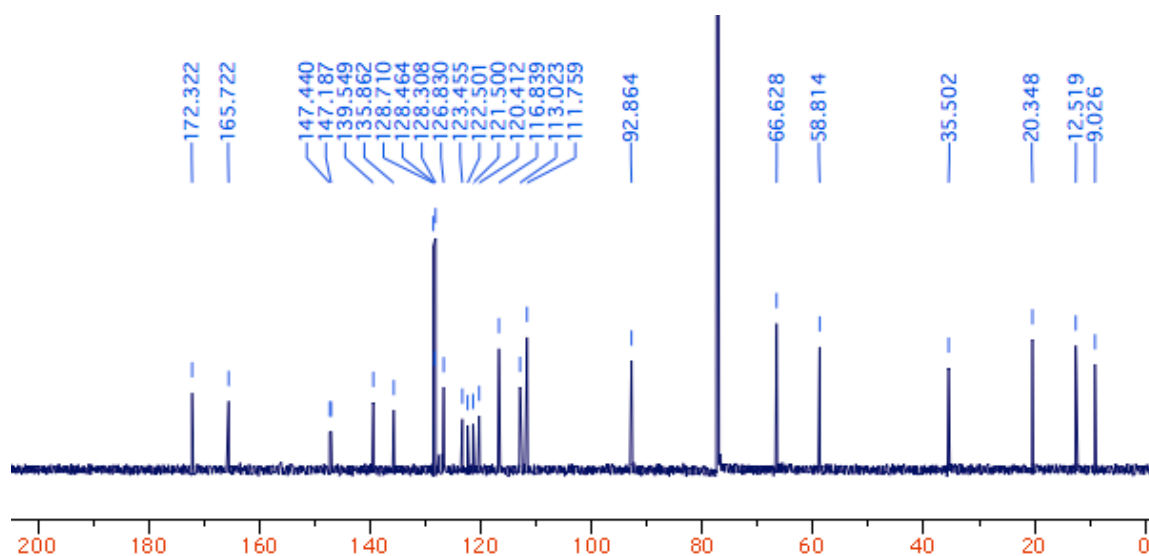

**(Z)-Benzyl 2-(2-((4-methoxy-1H,1H'-[2,2'-bipyrrol]-5-yl)methylene)-3,5-dimethyl-2H-pyrrol-4-yl)acetate (15a•HCl)**

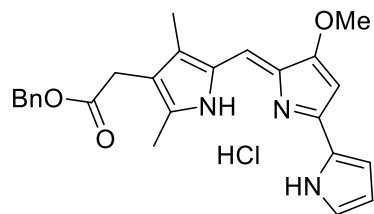

<sup>1</sup>H NMR; 300 MHz, CDCl<sub>3</sub>

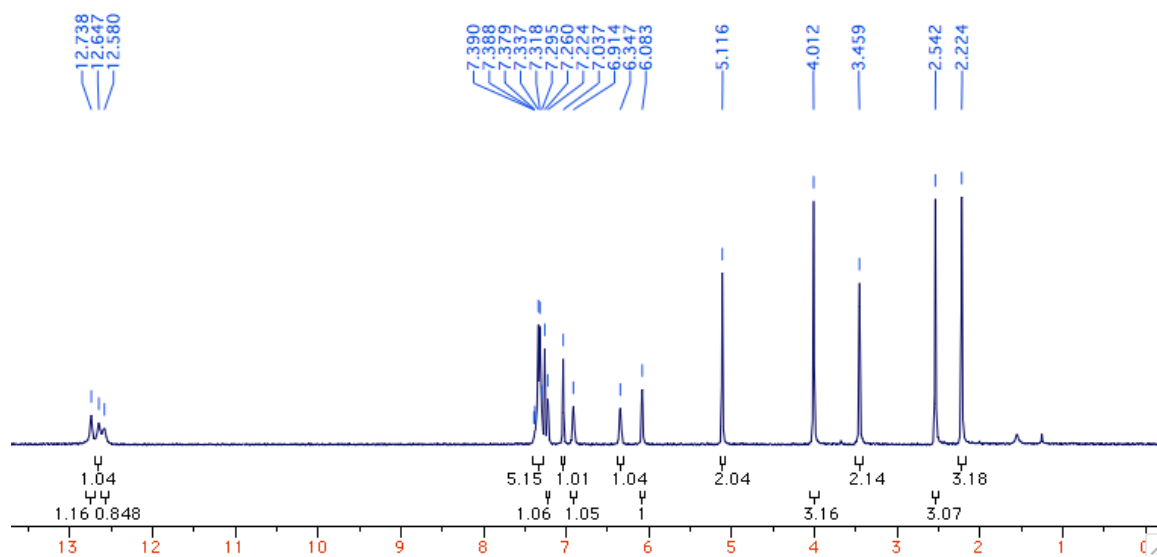

<sup>13</sup>C NMR; 125 MHz, CDCl<sub>3</sub>

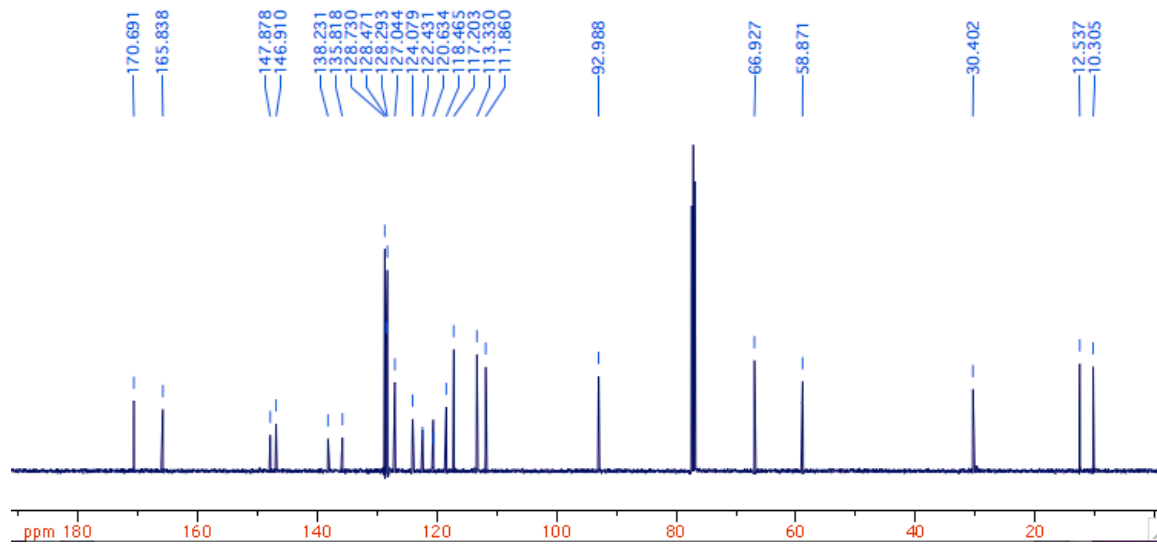

**(Z)-Hexyl 2-(2-((4-methoxy-1H,1H'-[2,2'-bipyrrrol]-5-yl)methylene)-3,5-dimethyl-2H-pyrrol-4-yl)acetate (15b•HCl)**

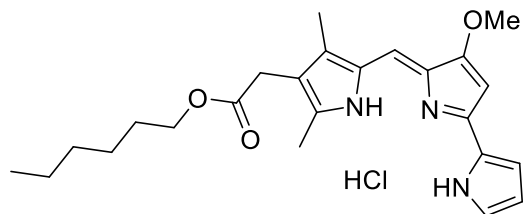

<sup>1</sup>H NMR; 500 MHz, CDCl<sub>3</sub>

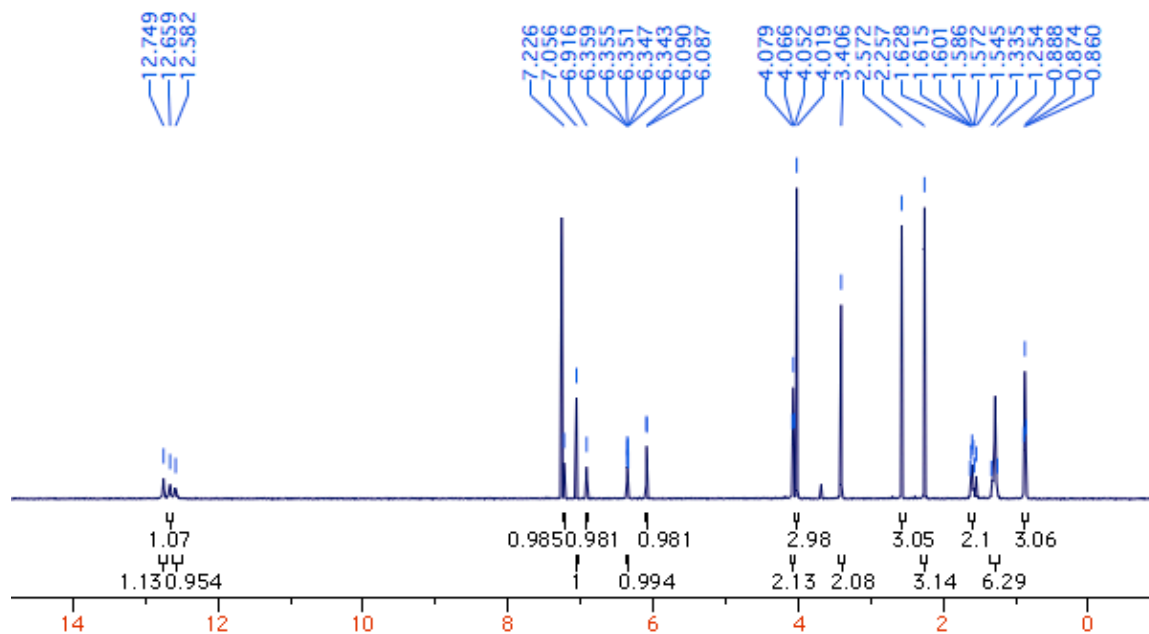

<sup>13</sup>C NMR; 125 MHz, CDCl<sub>3</sub>

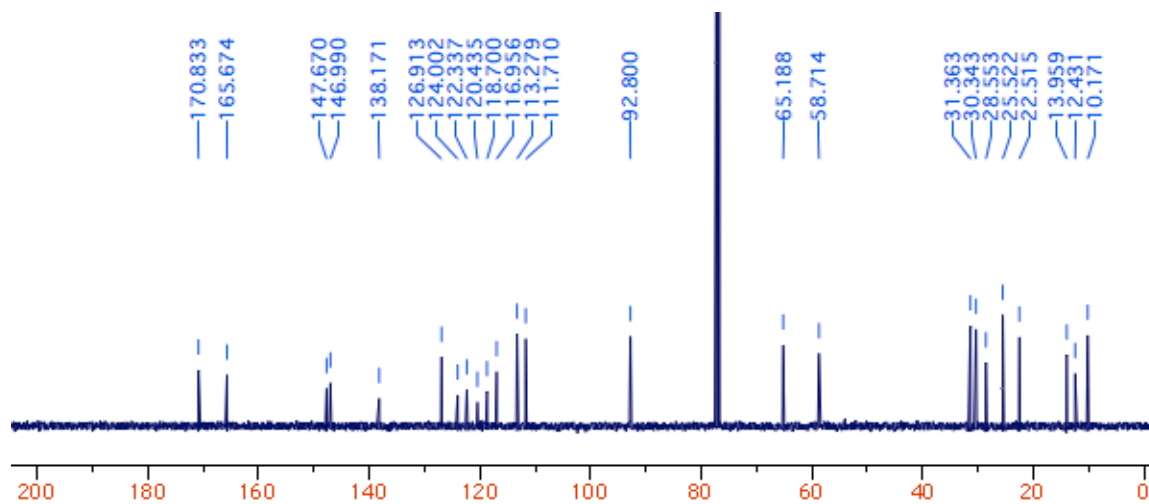



**(Z)-Neopentyl 2-(2-((4-methoxy-1H,1H'-[2,2'-bipyrrol]-5-yl)methylene)-3,5-dimethyl-2H-pyrrol-4-yl)acetate hydrochloride (15c•HCl)**

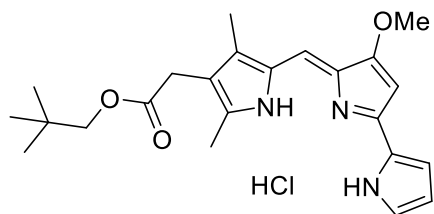

<sup>1</sup>H NMR; 300 MHz, CDCl<sub>3</sub>

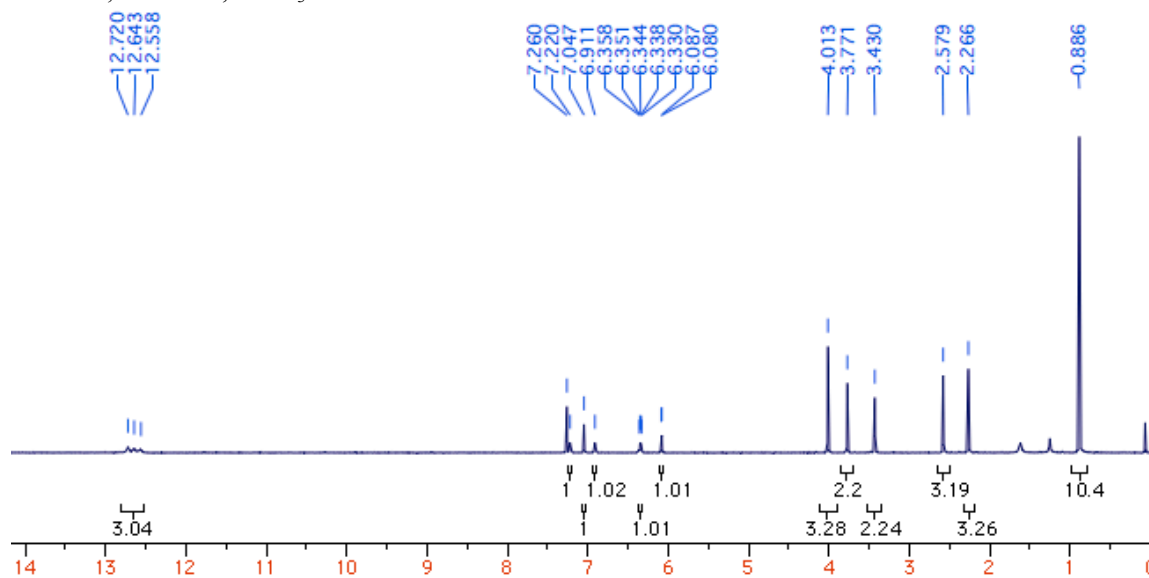

<sup>13</sup>C NMR; 125 MHz, CDCl<sub>3</sub>

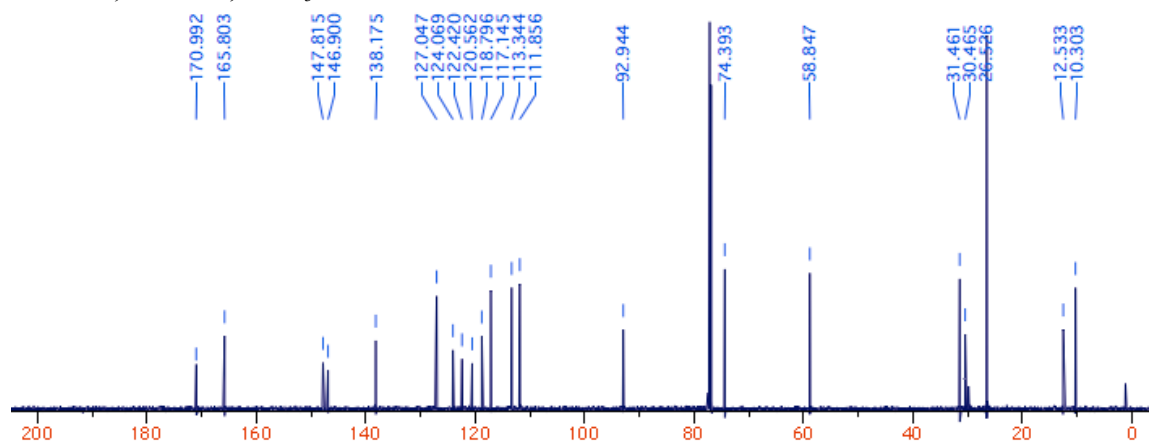

**(Z)-Benzyl 2-(2-((4-methoxy-1H,1H'-[2,2'-bipyrrol]-5-yl)methylene)-3,5-dimethyl-2H-pyrrol-4-yl)acetamide hydrochloride (15d•HCl)**

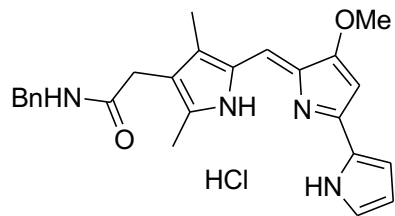

<sup>1</sup>H NMR; 300 MHz, CDCl<sub>3</sub>

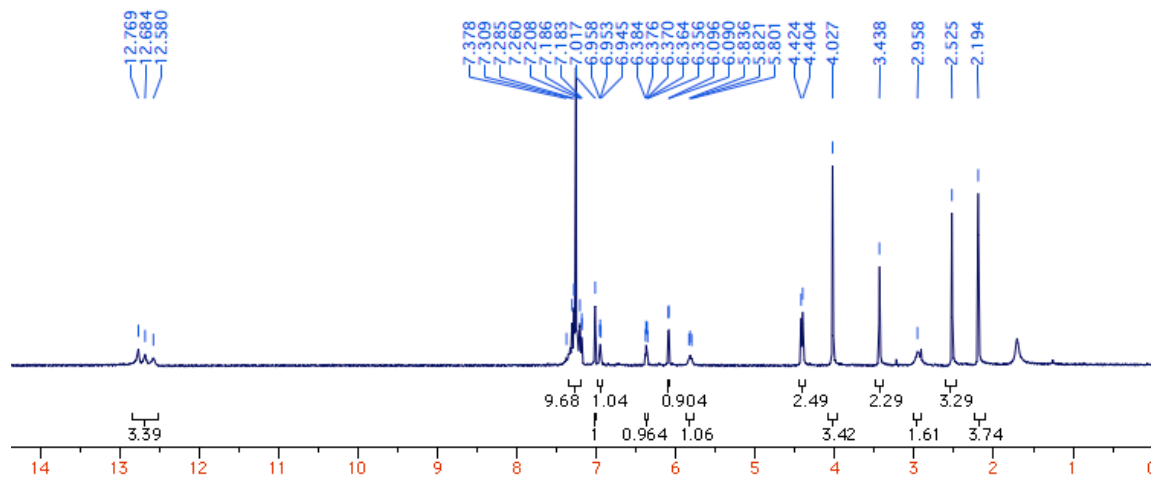

<sup>13</sup>C NMR; 125 MHz, CDCl<sub>3</sub>

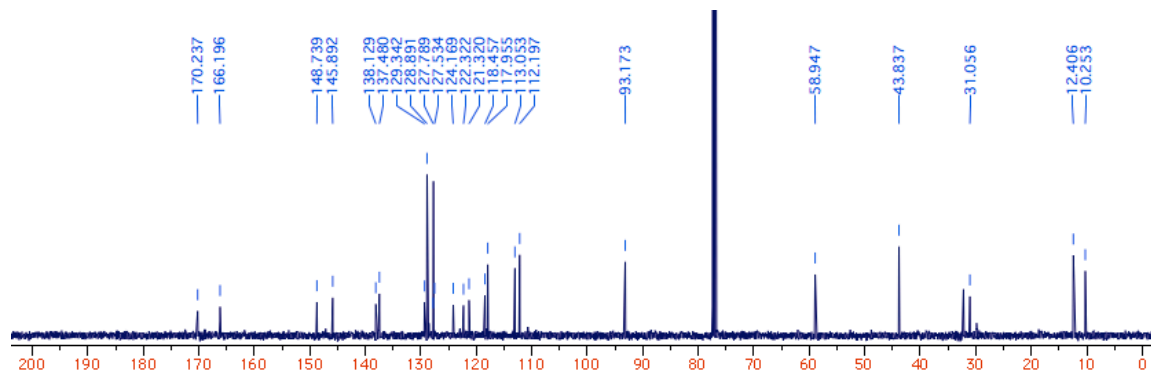

**(Z)-Butyl 2-(2-((4-methoxy-1H,1H'-[2,2'-bipyrrol]-5-yl)methylene)-3,5-dimethyl-2H-pyrrol-4-yl)acetamide hydrochloride (15e•HCl)**

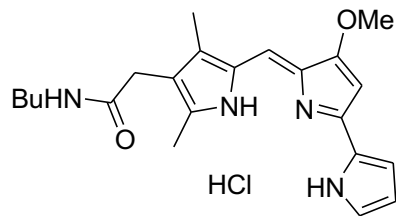

<sup>1</sup>H NMR; 300 MHz, CDCl<sub>3</sub>

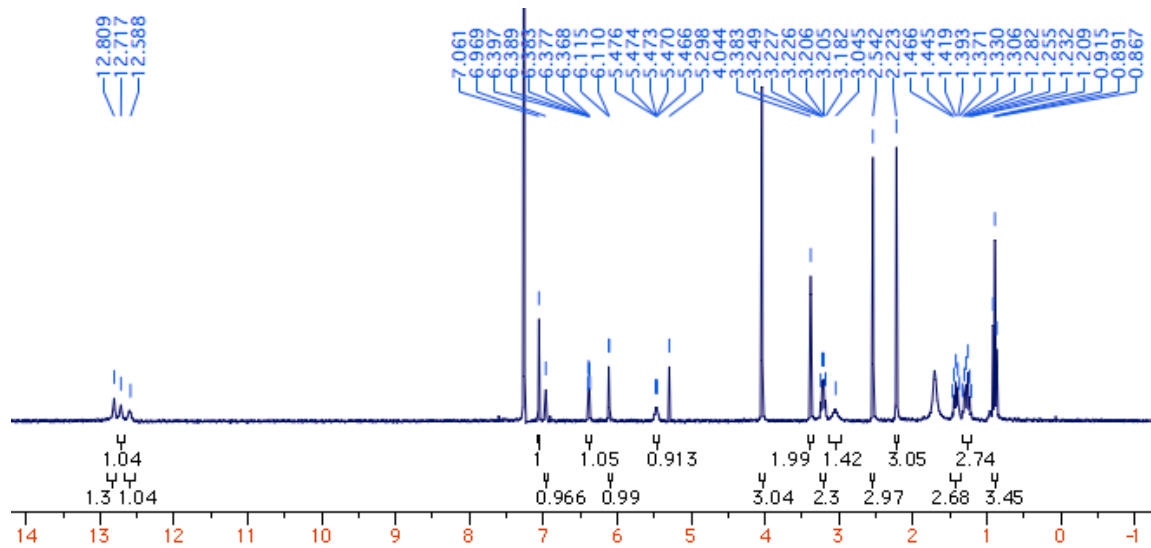

<sup>13</sup>C NMR; 125 MHz, CDCl<sub>3</sub>

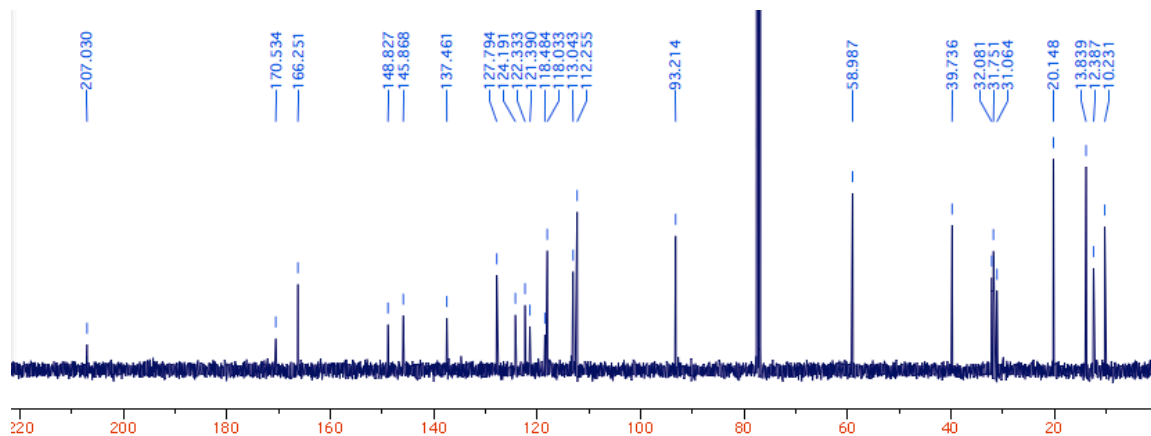

**(Z)-N,N-Diethyl 2-(2-((4-methoxy-1H,1H'-[2,2'-bipyrrol]-5-yl)methylene)-3,5-dimethyl-2H-pyrrol-4-yl)acetamide hydrochloride (15f•HCl)**

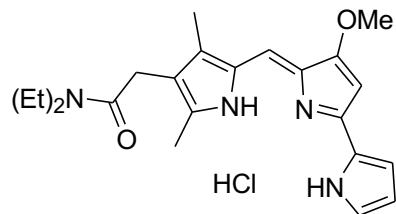

$^1\text{H}$  NMR; 300 MHz,  $\text{CDCl}_3$

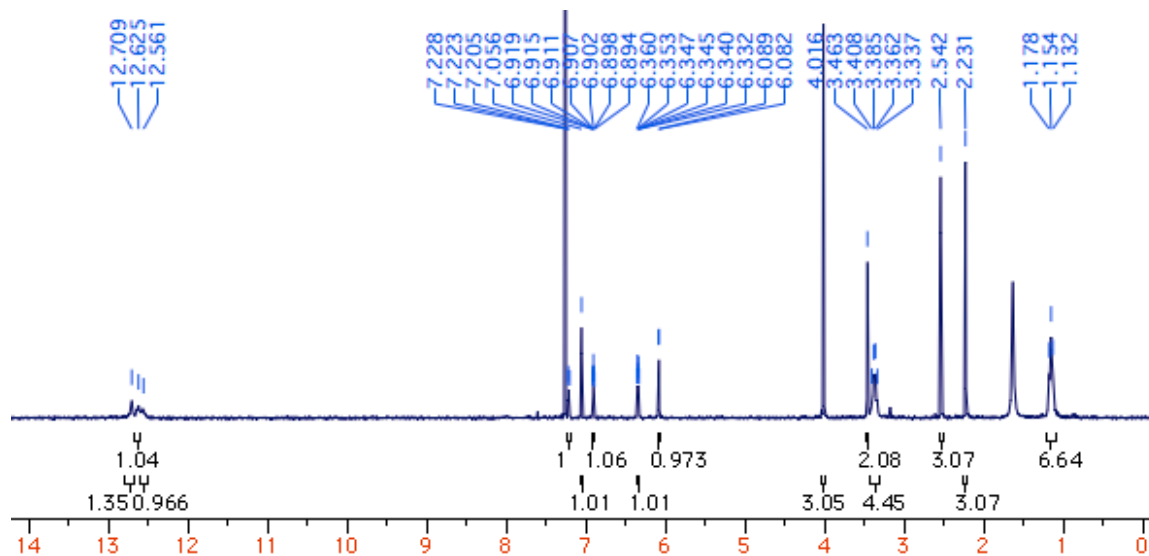

$^{13}\text{C}$  NMR; 125 MHz,  $\text{CDCl}_3$

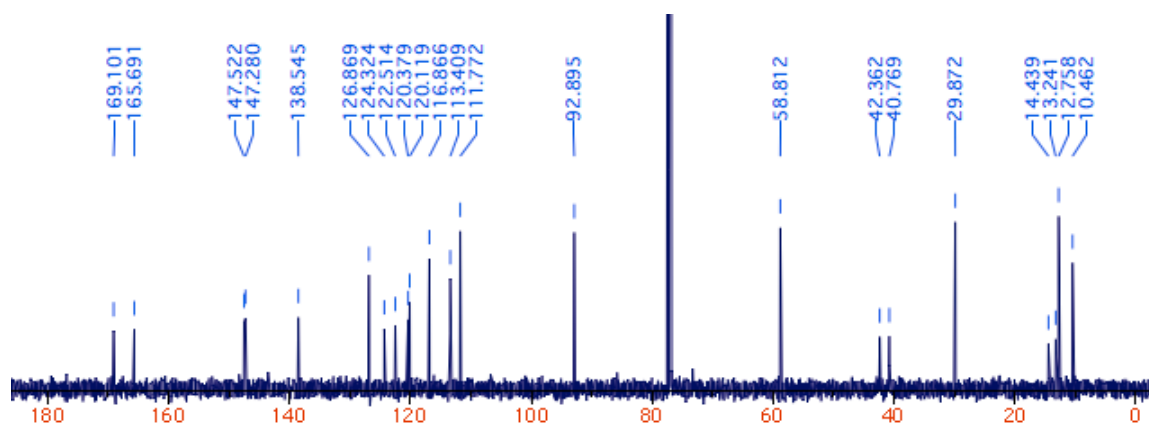

Supplement: c7ra01628j1.pdf [file c7ra01628j1.pdf]
